# Supplementary material for: Selective modulation of alkali metal ions on acetylcholinesterase
Source: Royal Society of Chemistry journal article supplement (doi:10.1039/d3cp02887a), 2023-01-01
Supplement: d3cp02887a1.pdf [file d3cp02887a1.pdf]

## Supplementary Information

### Modulation of alkali metal ions on acetylcholinesterase

Xia Mu,<sup>†a</sup> Shengwei Yuan,<sup>†ab</sup> Dinglin Zhang,<sup>†a</sup> Rui Lai,<sup>a</sup> Chenyi Liao,<sup>\*a</sup> Guohui Li<sup>\*a</sup>

<sup>a</sup>State Key Laboratory of Molecular Reaction Dynamics, Dalian Institute of Chemical Physics, Chinese Academy of Sciences, Dalian, China

<sup>b</sup>University of Chinese Academy of Sciences, Beijing, China

<sup>†</sup> These authors contribute equally to this work.

E-mail: cliao2@dicp.ac.cn, ghli@dicp.ac.cn

Table S1 Time-averaged geometric distances for ACh-hAChE complex obtained in DFTB/MM-MD simulations.

| list                                          | 150 mM Li  | 150 mM Na | 150 mM K   |
|-----------------------------------------------|------------|-----------|------------|
| H <sub>γ</sub> (S200)-N <sub>ε</sub> 2(H444)  | 2.9 ± 1.0  | 2.1 ± 0.3 | 2.1 ± 0.3  |
| O <sub>γ</sub> (S200)-C1(ACh)                 | 4.8 ± 1.8  | 6.2 ± 0.8 | 5.0 ± 1.4  |
| H <sub>δ</sub> 1(H444)-O <sub>ε</sub> 2(E331) | 3.0 ± 1.6  | 2.0 ± 0.4 | 1.8 ± 0.1  |
| O1-H(G118)                                    | 3.9 ± 0.9  | 5.3 ± 0.7 | 4.2 ± 1.2  |
| O1-H(G119)                                    | 2.9 ± 1.2  | 3.9 ± 0.6 | 3.8 ± 1.2  |
| O1-H(A201)                                    | 3.7 ± 2.0  | 6.5 ± 0.8 | 6.1 ± 1.9  |
| N1-W84-ring                                   | 4.2 ± 0.2  | 4.2 ± 0.2 | 4.2 ± 0.2  |
| N1-Y334-ring                                  | 10.2 ± 0.6 | 9.9 ± 0.4 | 10.3 ± 0.5 |
| N1-Y446-ring                                  | 5.3 ± 0.6  | 5.5 ± 0.3 | 5.2 ± 0.4  |

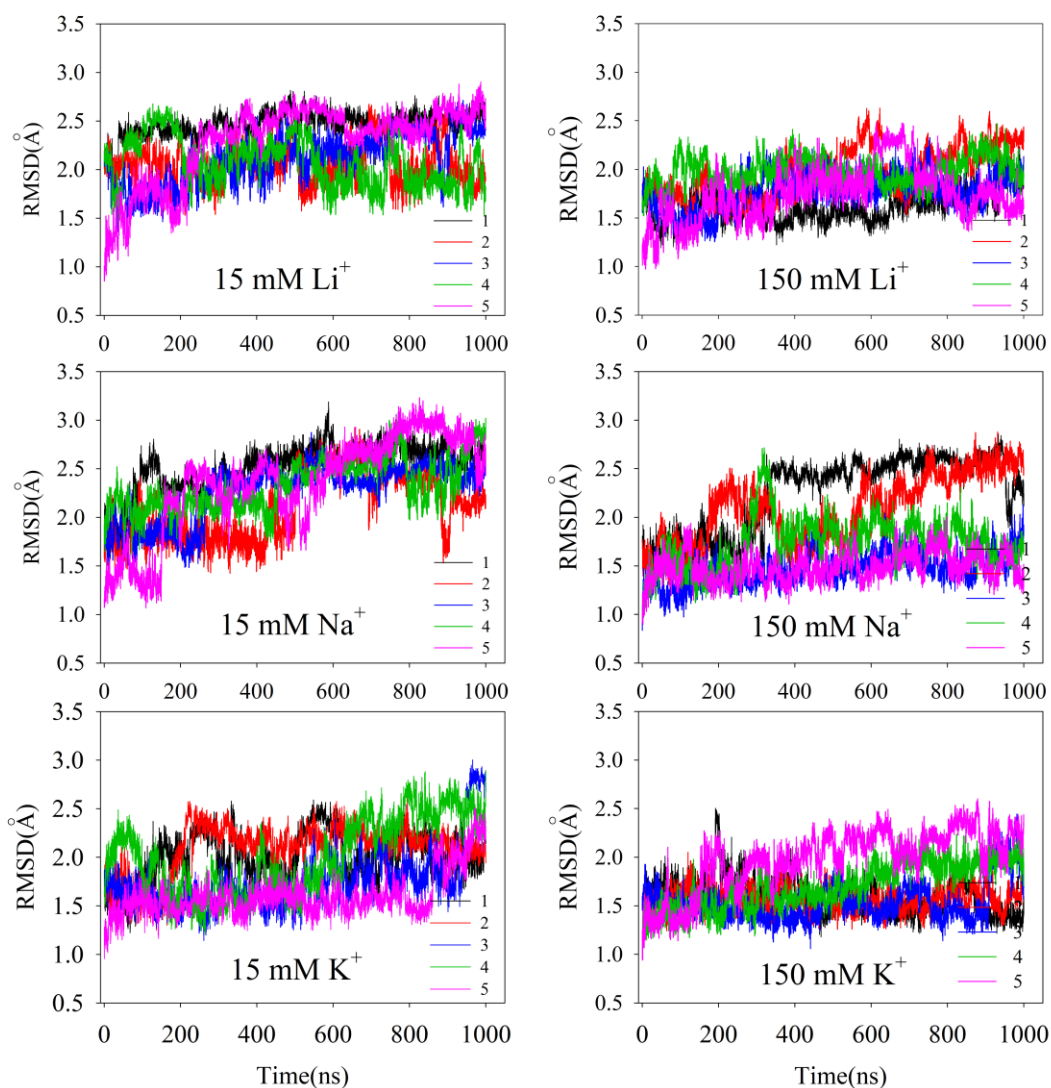

Fig. S1 Time evolution of RMSD of hAChE by C $\alpha$  alignment on initial structure in Li<sup>+</sup>, Na<sup>+</sup>, and K<sup>+</sup> systems of 15 mM and 150 mM, respectively. Each system was simulated with five copies.

We examine the conformation and dynamics of hAChE complex in Li<sup>+</sup>, Na<sup>+</sup>, and K<sup>+</sup> systems of 15 mM and 150 mM, respectively, in 1000-ns MD simulations. Indicated by the root means square deviations (RMSD) of hAChE in Fig. 1, the protein structure reached equilibrium at around 400 ns. Accordingly, we collected the last 200 ns for data analysis. Final RMSD values for the 15 mM systems are  $2.51 \pm 0.09$  Å (Li<sup>+</sup>),  $2.45 \pm 0.10$  Å (Na<sup>+</sup>), and  $2.17 \pm 0.12$  Å (K<sup>+</sup>), respectively. Overall, hAChE exhibits similar conformations in all 15 mM systems. The Li<sup>+</sup> and Na<sup>+</sup> systems exhibit a slightly higher RMSD value than the K<sup>+</sup> system. The RMSD values for the 150 mM systems are  $1.68 \pm 0.15$  Å (Li<sup>+</sup>),  $1.48 \pm 0.15$  Å (Na<sup>+</sup>), and  $1.51 \pm 0.14$  Å (K<sup>+</sup>), indicating the RMSD evolutions of hAChE in three ion systems are similar. In general, the conformation of hAChE in the 150 mM system is more stable than it in the 15 mM system enzyme.

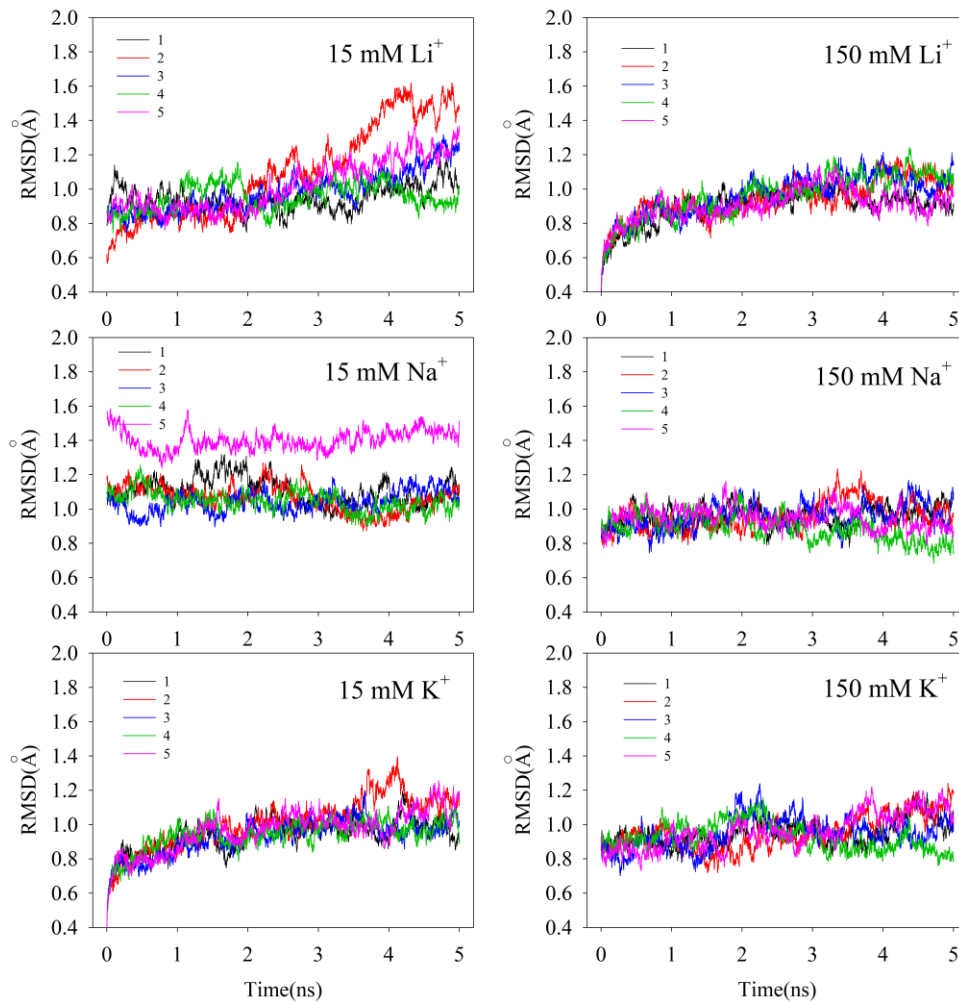

Fig. S2 RMSD results of five QM/MM-MD simulations for all systems.

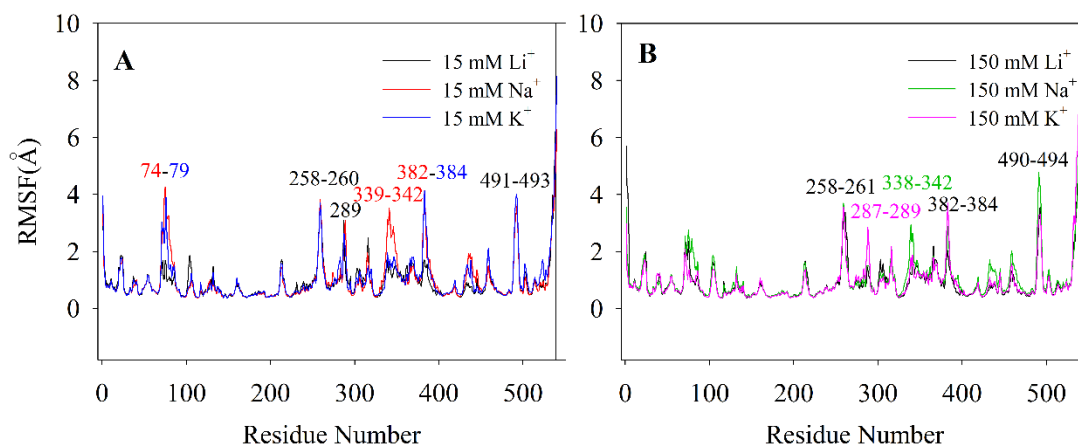

Fig. S3 RMSF per residue of hAChE in Li<sup>+</sup>, Na<sup>+</sup>, and K<sup>+</sup> systems of 15 mM and 150 mM, respectively. High RMSF regions that exist in all three ion systems are labeled upon the RMSF peaks and colored in black. High RMSF regions that only exist in certain ion

system(s) are labeled upon the RMSF peaks using the same system color(s) as the color scheme to the upper right.

There are six regions that exhibit RMSF peaks of different heights, which locate at res. 74-79, 258-260, 289, 339-342, 382-384 and 491-493. In the 15 mM systems, the  $\text{Li}^+$  system displays low RMSF in res. 74-49, 339-342, and 383-384, while the  $\text{Na}^+$  system exhibits high RMSF in res. 339-342. In the 150 mM systems, the  $\text{Na}^+$  system displays high RMSF in res. 338-342, while the  $\text{K}^+$  system exhibits high RMSF in res. 287-289. The structural alignment of hAChE in  $\text{Na}^+$  system and in crystal structure is shown in Fig. 3. The res. 338-342 as a loop between two helices was observed to form helical conformation during the simulation, which is likely attributed to certain potential ion binding sites.

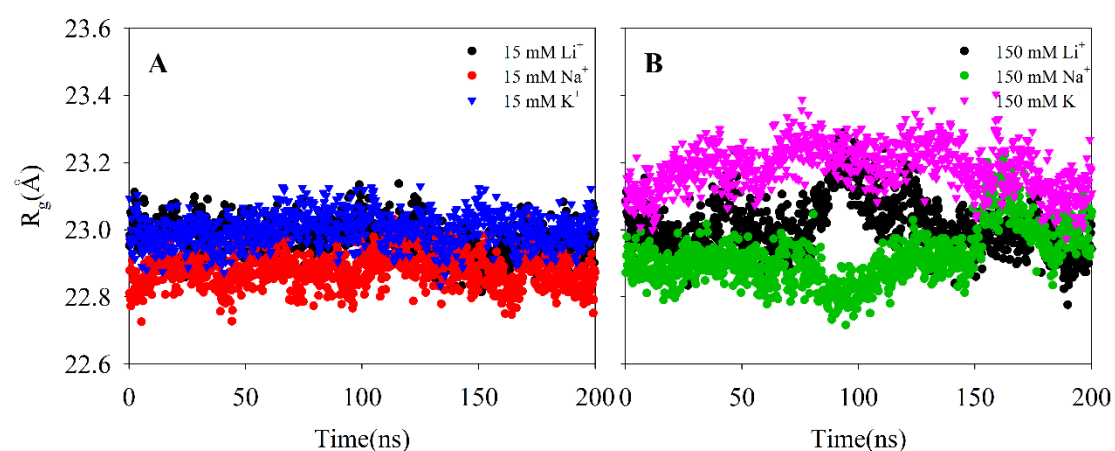

Fig. S4. Radius of gyration ( $R_g$ ) of hAChE in  $\text{Li}^+$ ,  $\text{Na}^+$ , and  $\text{K}^+$  systems of (A) 15 mM and (B) 150 mM, respectively in the last 200 ns.

The  $R_g$  in three 15 mM systems are similar, around 22.9~23 Å, while vary significantly in the 150 mM systems. In the 150 mM systems, hAChE in the  $\text{Na}^+$  system exhibits the smallest  $R_g$ ; hAChE in the  $\text{Li}^+$  system shows intermediate  $R_g$ , and hAChE in the  $\text{K}^+$  system displays the highest  $R_g$ . By comparing the  $R_g$  in the two concentrations systems, hAChE was affected the most by high concentration of  $\text{K}^+$ , while less affected by changing concentrations of  $\text{Li}^+$  and  $\text{Na}^+$ , which encourages us to go further into the modulation mechanism of different ion species.

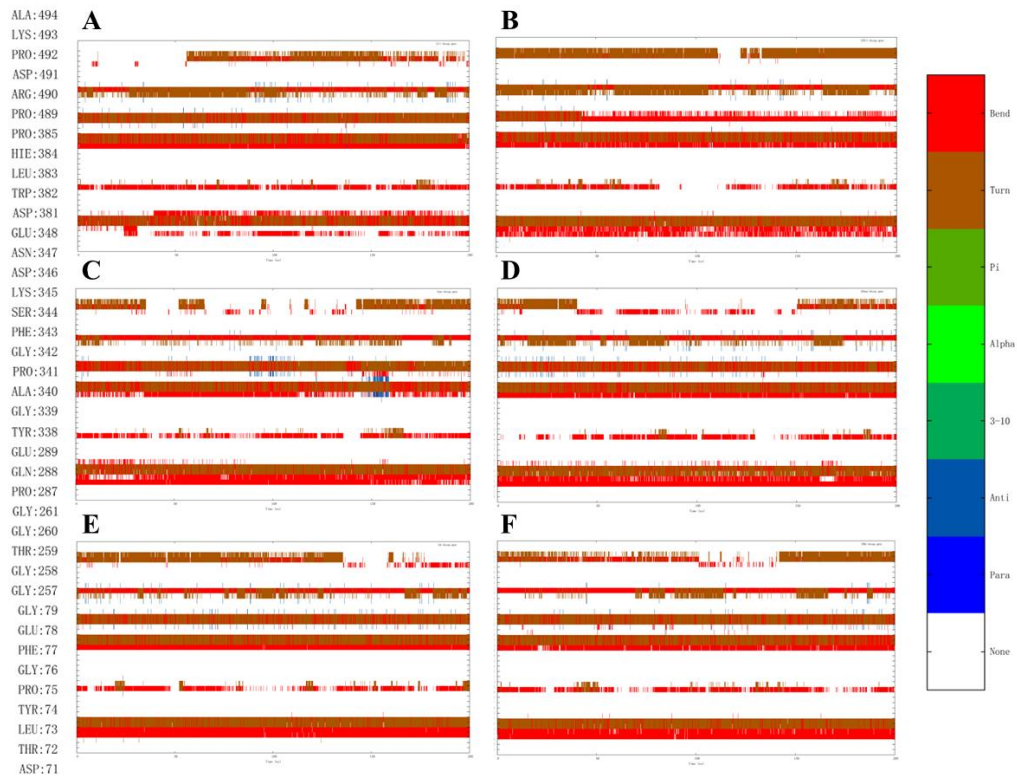

Fig. S5 DSSP secondary structure results of hAChE fragments in  $\text{Li}^+$ ,  $\text{Na}^+$ ,  $\text{K}^+$  of 15 mM (in A,C,E) and 150 mM (in B,D,F), respectively in the last 200 ns, the color bar represented different secondary structures. These fragments are residue 71-79, 257-261, 287-289, 338-348, 381-385 and 489-494 in RMSF results.

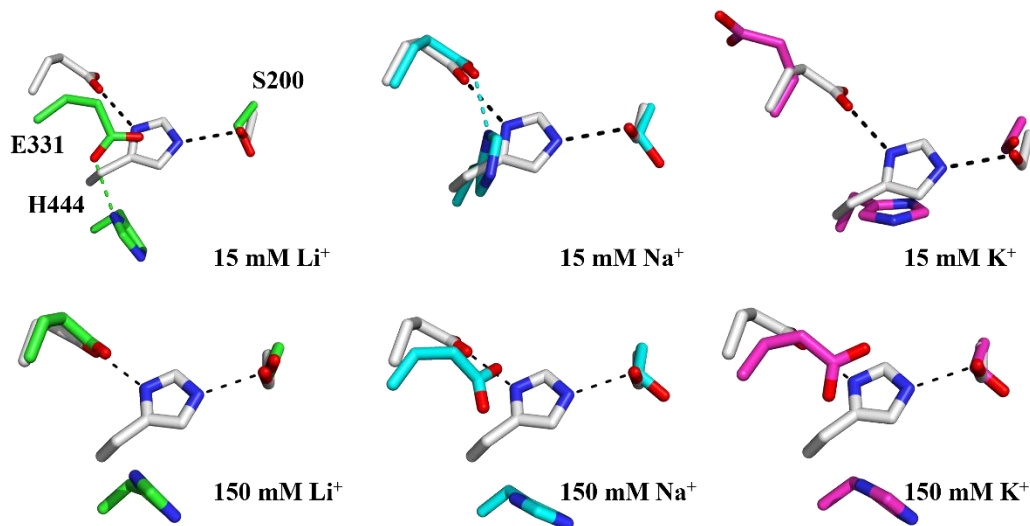

Fig. S6 The alignment view of conformational representative on the crystal structure for the residues at the active site.

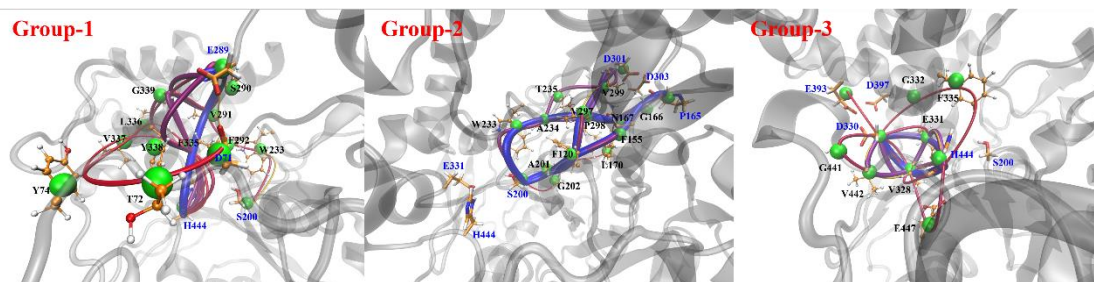

Fig. S7 optimal path from ion binding sites to active sites.

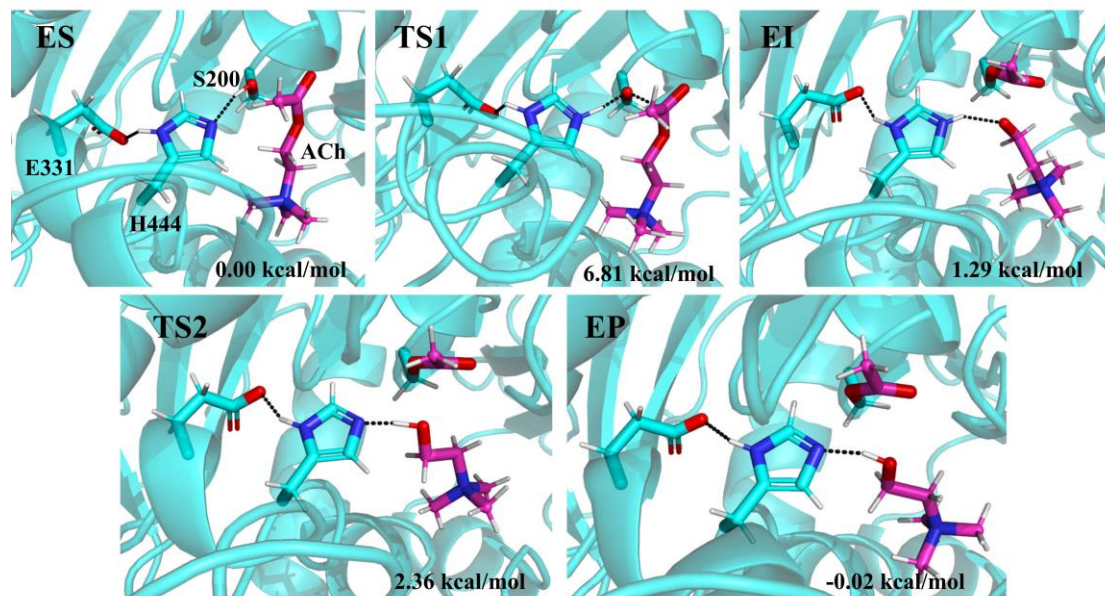

Fig. S8 Snapshot structures of ACh hydrolysis in the 15 mM Na<sup>+</sup> system.

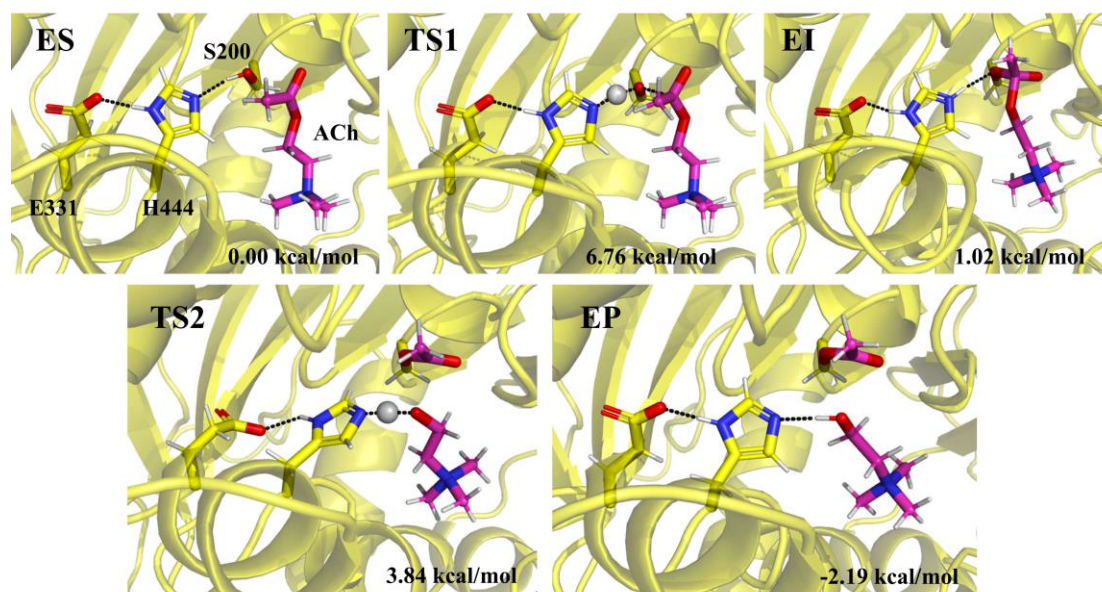

Fig. S9 Snapshot structures of ACh hydrolysis in the 15 mM K<sup>+</sup> system.

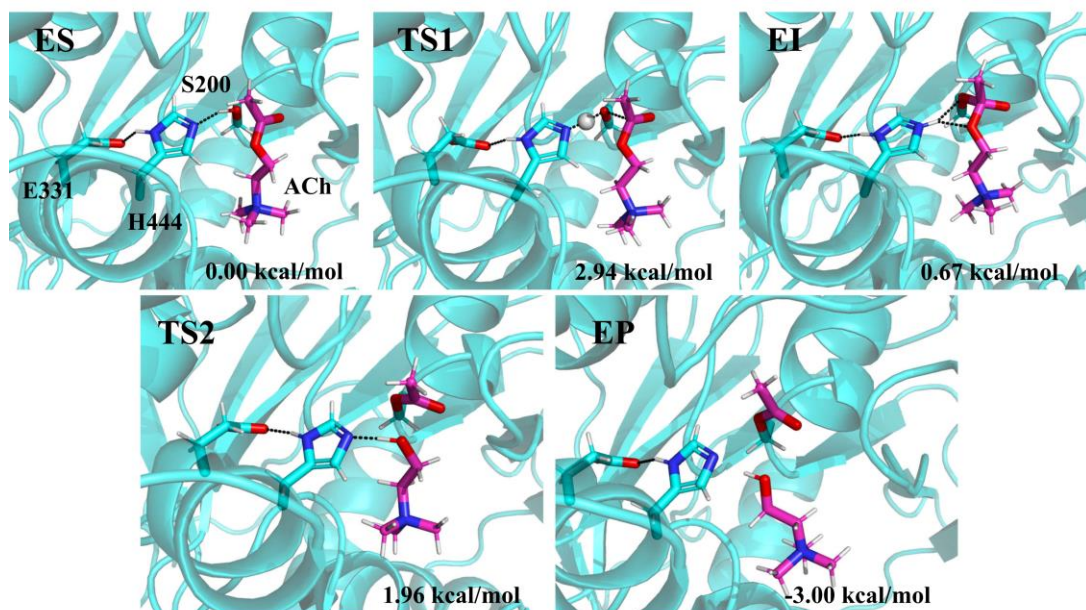

Fig. S10 Snapshot structures of ACh hydrolysis in the 150 mM Na<sup>+</sup> system.

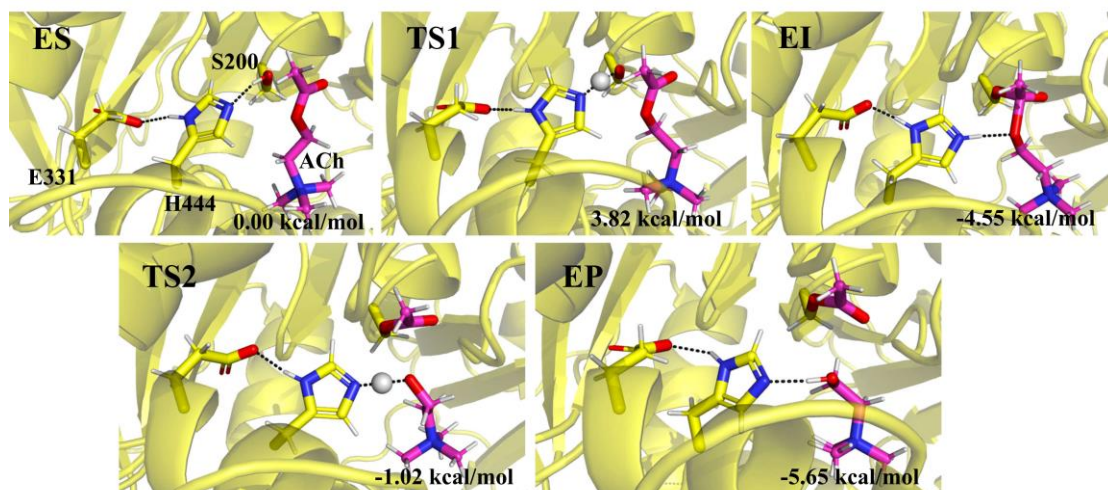

Fig. S11 Snapshot structures of ACh hydrolysis in the 150 mM K<sup>+</sup> system.
